# Supplementary material for: Sexual Reproduction via a 1-Aminocyclopropane-1-Carboxylic Acid-Dependent Pathway Through Redox Modulation in the Marine Red Alga Pyropia yezoensis (Rhodophyta)
Source: PubMed Central journal article supplement (PMC7028691; doi:10.3389/fpls.2020.00060), 2020-02-12
Supplement: DataSheet_1.pdf [file DataSheet_1.pdf]

Table S1. The list of primers used for gene expression analysis by quantitative Real Time PCR

| Primer name | Contig ID          | Sequence (5'-3')      |
|-------------|--------------------|-----------------------|
| PyRboh-F1   | contig_36762_g8710 | TTGTGCTCACCTTCCTGATG  |
| PyRboh-R1   | contig_36762_g8710 | GCGTTCCAGTTGATGAGGTT  |
| PyGalDH-F1  | contig_27288_g6714 | TTTTTGACGTGAGCCCCCTAC |
| PyGalDH-R1  | contig_27288_g6714 | AGTCCCCAAACTCAATGTCG  |
| PyGCL-F1    | contig_6454_g1464  | GACCTGGTGGAGCAAAACAT  |
| PyGCL-R1    | contig_6454_g1464  | GAATGTTGCGCGACAGAGTA  |
| PyGR-F1     | contig_21457_g5287 | CGTGTTCAAGAGCGACTTCA  |
| PyGR-R1     | contig_21457_g5287 | CTAGTCGGGTGTACGCCAAT  |
| PyAPX1-F1   | contig_10207_g2440 | ATCAGCTACGCGGACCTCTA  |
| PyAPX1-R1   | contig_10207_g2440 | AAGCCCATCCGGTAAAAGAT  |
| PyAPX2-F1   | contig_9033_g2146  | AGGTGCCCATTGTCTTTGAC  |
| PyAPX2-R1   | contig_9033_g2146  | CCTTTGAATAGTCGGCGAAA  |
| PyAPX3-F1   | contig_35733_g8551 | TTGGGAATGGGTACCTCAAG  |
| PyAPX3-R1   | contig_35733_g8551 | GCCCAGCAACTTGACACTCT  |
| PyMDHR1-F1  | contig_11687_g2778 | GCTGCCAGGTCAAGATGATT  |
| PyMDHR1-R1  | contig_11687_g2778 | TCGTCACCCAGAATCTCCTC  |
| PyMDHR2-F1  | contig_2056_g353   | GGTACATTGGGATGGAGGTG  |
| PyMDHR2-R1  | contig_2056_g353   | ACCTCATCCTTGACGTGGTC  |
| PyDHAR-F1   | contig_4779_g1033  | GTGTTCTCTCGCACCTCTC   |
| PyDHAR-R1   | contig_4779_g1033  | TGGTAAAACCTCGGCCATCTC |
| Py18S-F1    | * D79976           | AGGGTTGATCCGCAGGGAAG  |
| Py18S-R1    | * D79976           | GCTTGCGCCCACTCCATTAG  |

\*Accession number in GenBank
